# Supplementary material for: Late date of human arrival to North America: Continental scale differences in stratigraphic integrity of pre-13,000 BP archaeological sites
Source: PLOS journal article supplement (doi:10.1371/journal.pone.0264092), 2022-04-20
Supplement: S19 (10.1371/journal.pone.0264092.s019) [file journal.pone.0264092.s019]

| Min Elev. (m) | Max Elev. (m) | Count |
|---------------|---------------|-------|
| 99.45         | 99.5          | 1     |
| 99.4          | 99.45         | 0     |
| 99.35         | 99.4          | 1     |
| 99.3          | 99.35         | 1     |
| 99.25         | 99.3          | 0     |
| 99.2          | 99.25         | 1     |
| 99.15         | 99.2          | 1     |
| 99.1          | 99.15         | 5     |
| 99.05         | 99.1          | 1     |
| 99            | 99.05         | 31    |
| 98.95         | 99            | 31    |
| 98.9          | 98.95         | 0     |
| 98.85         | 98.9          | 1     |
| 98.8          | 98.85         | 0     |

Table S10. Artifact counts by 5 cm level for N 87 to 89 m and E 110 to 111 m from the Owl Ridge site.
